# Supplementary material for: Surface Environment and Energy Density Effects on the Detection and Disinfection of Microorganisms Using a Portable Instrument
Source: MDPI journal article supplement (doi:10.3390/s23042135), 2023-02-14
Supplement: s1 [file s1]

Article

# Surface Environment and Energy Density Effects on the Detection and Disinfection of Microorganisms Using a Portable Instrument

Sungho Shin <sup>1</sup>, Brianna Dowden <sup>1</sup>, Iyll-Joon Doh <sup>1</sup>, Bartek Rajwa <sup>2</sup>, Euiwon Bae <sup>3</sup> and J. Paul Robinson <sup>1,4,\*</sup>

<sup>1</sup> Department of Basic Medical Sciences, Purdue University, West Lafayette, IN 47907, USA; shin331@purdue.edu (S.S.); dowdenb@purdue.edu (B.D.); idoh@purdue.edu (I.-J.D.)

<sup>2</sup> Bindley Bioscience Center, Purdue University, West Lafayette, IN 47907, USA; brajwa@purdue.edu

<sup>3</sup> School of Mechanical Engineering, Purdue University, West Lafayette, IN 47907, USA; ebae@purdue.edu

<sup>4</sup> Weldon School of Biomedical Engineering, Purdue University, West Lafayette, IN 47907, USA

\* Correspondence: jpr@cyto.purdue.edu

## Supplementary Materials

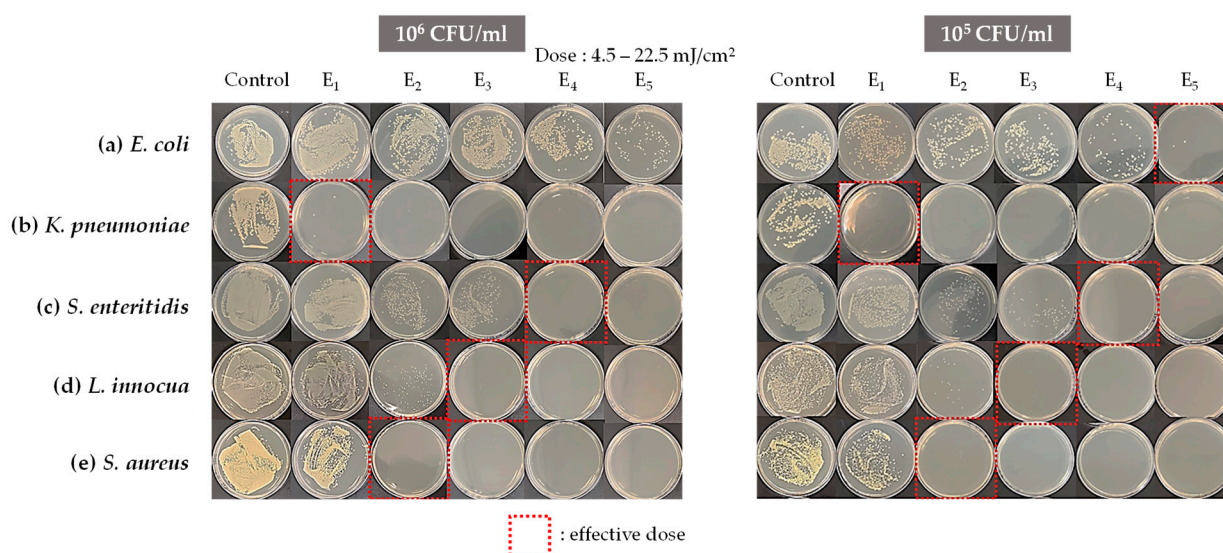

**Figure S1.** Plate pictures after incubation at two different concentrations ( $10^6$  and  $10^5$  CFU/ml) for (a) *E. coli*, (b) *K. pneumoniae*, (c) *S. enteritidis*, (d) *L. innocua*, and (e) *S. aureus*.
